# Supplementary material for: Molecular Modeling of Allosteric Site of Isoform-Specific Inhibition of the Peroxisome Proliferator-Activated Receptor PPARγ
Source: MDPI journal article supplement (doi:10.3390/biom12111614), 2022-11-01
Supplement: s1 [file s1]

# Molecular Modeling of Allosteric Site of Isoform-Specific Inhibition of the Peroxisome Proliferator-activated Receptor PPAR $\gamma$

*Suliman Almahmoud<sup>1\*</sup> and Haizhen A. Zhong<sup>2\*</sup>*

<sup>1</sup> Department of Medicinal Chemistry and Pharmacognosy, College of Pharmacy, Qassim University, Buraidah 51452, Saudi Arabia

<sup>2</sup> Department of Chemistry, University of Nebraska at Omaha, Omaha, Nebraska 68182, United States

\* Correspondence: HAZ: hzhong@unomaha.edu; Tel.: (1) (402) 554-3145; co-Correspondence: SA; s.a.almahmoud@hotmail.com.

Table S1. The chemical structures of PPAR $\gamma$  antagonists.

Table S2. The chemical structures of PPAR $\gamma$  antagonists.

Figure S1. The chemical structures of PPAR $\gamma$  agonists.

Table S3. Glide docking scores (GScore, kcal/mol) of drug-like molecules extracted from a NCI database Against the PPAR $\gamma$  (2HFP) at allosteric site.

Table S4. Interacting residues of PPAR $\gamma$  antagonists at the orthosteric site.

Table S5. Interacting residues of PPAR $\gamma$  agonists at the orthosteric site and the allosteric site based on the Induced-Fit Docking.

**Table S1.** The chemical structures of PPAR $\gamma$  antagonists taken from Hopkins' paper [1].

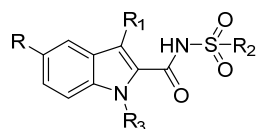

| Compound   | R   | R <sub>1</sub>        | R <sub>2</sub>         | R <sub>3</sub>        |
|------------|-----|-----------------------|------------------------|-----------------------|
| <b>NSI</b> | H   | 4-CH <sub>3</sub> OPh | Ph                     | 3-CF <sub>3</sub> Bn  |
| <b>1</b>   | H   | 4-CH <sub>3</sub> OPh | 4-F-Ph                 | 3-CF <sub>3</sub> Bn  |
| <b>2</b>   | H   | 4-CH <sub>3</sub> OPh | 2-CO <sub>2</sub> MePh | 3-CF <sub>3</sub> Bn  |
| <b>3</b>   | H   | 4-CH <sub>3</sub> OPh | 2-CH <sub>3</sub> Ph   | 3-CF <sub>3</sub> Bn  |
| <b>4</b>   | H   | 4-CH <sub>3</sub> OPh | Me                     | 3-CF <sub>3</sub> Bn  |
| <b>5</b>   | H   | H                     | Ph                     | 3-CF <sub>3</sub> Bn  |
| <b>6</b>   | H   | H                     | 4-F-Ph                 | 3-CF <sub>3</sub> Bn  |
| <b>7</b>   | H   | H                     | 4-Cl-Ph                | 3-CF <sub>3</sub> Bn  |
| <b>8</b>   | H   | H                     | 3-CF <sub>3</sub> -Ph  | 3-CF <sub>3</sub> Bn  |
| <b>9</b>   | H   | H                     | 4-CH <sub>3</sub> Ph   | 3-CF <sub>3</sub> Bn  |
| <b>10</b>  | H   | H                     | 2-CH <sub>3</sub> Ph   | 3-CF <sub>3</sub> Bn  |
| <b>11</b>  | H   | H                     | 2-Naphthyl             | 3-CF <sub>3</sub> Bn  |
| <b>12</b>  | H   | H                     | 2-CF <sub>3</sub> -Ph  | 3-CF <sub>3</sub> Bn  |
| <b>13</b>  | H   | H                     | 2-(5-Chlorothiophene)  | 3-CF <sub>3</sub> Bn  |
| <b>14</b>  | H   | H                     | Me                     | 3-CF <sub>3</sub> Bn  |
| <b>15</b>  | H   | H                     | 4-CF <sub>3</sub> -Ph  | 4-CF <sub>3</sub> Bn  |
| <b>16</b>  | H   | H                     | 3-CF <sub>3</sub> -Ph  | 3-CH <sub>3</sub> OBn |
| <b>17</b>  | H   | H                     | 3-CF <sub>3</sub> -Ph  | 3-CF <sub>3</sub> OBn |
| <b>18</b>  | H   | H                     | 3-CF <sub>3</sub> -Ph  | Et                    |
| <b>19</b>  | H   | H                     | 3-CF <sub>3</sub> -Ph  | 4-CF <sub>3</sub> Bn  |
| <b>20</b>  | H   | H                     | 3-CF <sub>3</sub> -Ph  | 3-BnOBn               |
| <b>21</b>  | H   | H                     | 3-CF <sub>3</sub> -Ph  | Bn                    |
| <b>22</b>  | H   | H                     | 3-CF <sub>3</sub> -Ph  | 2,5-DiClBn            |
| <b>23</b>  | H   | H                     | 3-CF <sub>3</sub> -Ph  | 4- <i>t</i> -BuBn     |
| <b>24</b>  | Cl  | H                     | 3-CF <sub>3</sub> -Ph  | 3-CF <sub>3</sub> Bn  |
| <b>25</b>  | OBn | H                     | 3-CF <sub>3</sub> -Ph  | 3-CF <sub>3</sub> Bn  |
| <b>26</b>  | OH  | H                     | 3-CF <sub>3</sub> -Ph  | 3-CF <sub>3</sub> Bn  |

**Table S2.** The chemical structures of PPAR $\gamma$  antagonists taken from Asteian's paper [2].

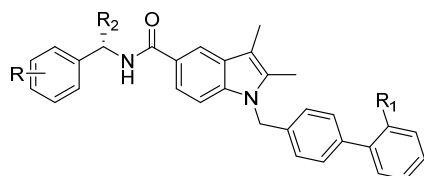

| Compound  | R                 | R <sub>1</sub> | R <sub>2</sub>  | Compound      | R                 | R <sub>1</sub>                     | R <sub>2</sub>  |
|-----------|-------------------|----------------|-----------------|---------------|-------------------|------------------------------------|-----------------|
| <b>27</b> | 2-CH <sub>3</sub> | COOH           | H               | <b>SR1664</b> | 4-NO <sub>2</sub> | COOH                               | CH <sub>3</sub> |
| <b>28</b> | 2-NH <sub>2</sub> | COOH           | H               | <b>36</b>     | 3-iPr             |                                    | CH <sub>3</sub> |
| <b>29</b> | 2-NO <sub>2</sub> | COOH           | H               | <b>37</b>     | 3-iPr             |                                    | CH <sub>3</sub> |
| <b>30</b> | 3-iPr             | COOH           | CH <sub>3</sub> | <b>38</b>     | 3-iPr             |                                    | CH <sub>3</sub> |
| <b>31</b> | 3-                | COOH           | CH <sub>3</sub> | <b>39</b>     | 3-iPr             | CONHOH                             | CH <sub>3</sub> |
| <b>32</b> | 3-tBu             | COOH           | CH <sub>3</sub> | <b>40</b>     | 3-iPr             | CONH <sub>2</sub>                  | CH <sub>3</sub> |
| <b>33</b> | 4-iPr             | COOH           | CH <sub>3</sub> | <b>41</b>     | 3-iPr             | CON(CH <sub>3</sub> ) <sub>2</sub> | CH <sub>3</sub> |
| <b>34</b> | 4-tBu             | COOH           | CH <sub>3</sub> | <b>42</b>     | 3-iPr             | COOH                               | CF <sub>3</sub> |
| <b>35</b> | 3-                | COOH           | CH <sub>3</sub> | <b>43</b>     | 3-iPr             | COOH                               | 3-iPr           |

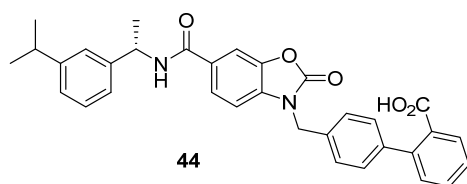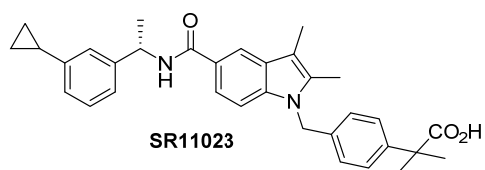

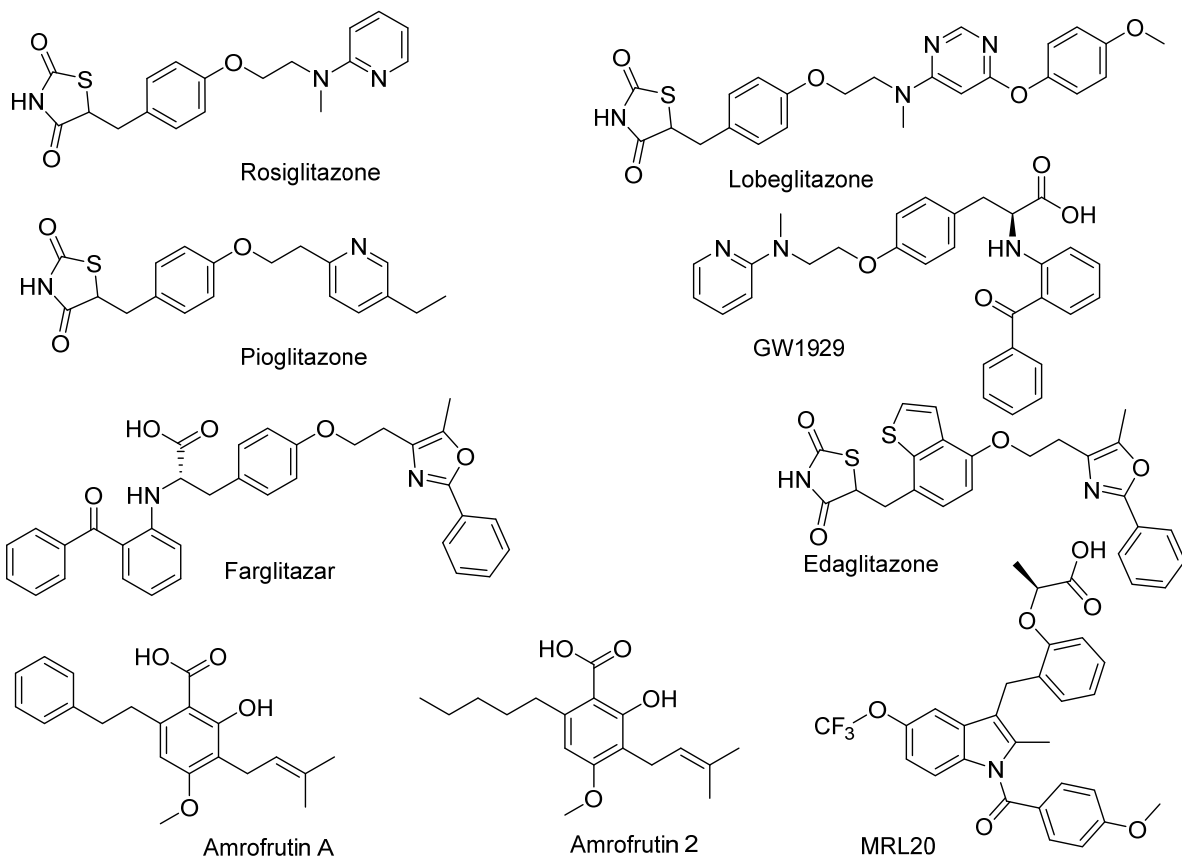

**Figure S1.** The chemical structures of PPAR $\gamma$  agonists.

**Table S3.** Glide docking scores (GScore, kcal/mol) of drug-like molecules extracted from a NCI database Against the PPAR $\gamma$  (2HFP) at allosteric site.

| NCI ID | GScore |
|--------|--------|--------|--------|--------|--------|--------|--------|--------|--------|
| 116    | -6.57  | 47742  | -8.92  | 95895  | -5.44  | 130813 | -8.28  | 171538 | -6.30  |
| 153    | -6.13  | 48151  | -7.65  | 99547  | -8.54  | 130842 | -5.41  | 172540 | -7.21  |
| 3098   | -3.65  | 49628  | -6.92  | 101523 | -8.59  | 131366 | -8.68  | 172846 | -7.50  |
| 6918   | -5.84  | 51478  | -5.27  | 101672 | -6.10  | 131367 | -8.92  | 177363 | -7.99  |
| 7579   | -7.68  | 52003  | -6.80  | 101793 | -8.08  | 132263 | -7.31  | 178023 | -7.99  |
| 8008   | -7.78  | 53199  | -5.51  | 103843 | -7.19  | 132898 | -7.22  | 178889 | -6.78  |
| 8490   | -5.87  | 54906  | -6.76  | 105274 | -2.80  | 134118 | -6.13  | 180617 | -7.27  |
| 8609   | -8.76  | 56243  | -8.84  | 105337 | -6.56  | 135634 | -6.89  | 180627 | -7.71  |
| 8611   | -9.12  | 57034  | -10.75 | 106156 | -9.66  | 135848 | -9.42  | 180642 | -6.90  |
| 9011   | -4.64  | 60616  | -7.64  | 106221 | -6.73  | 139461 | -7.25  | 180648 | -7.63  |
| 9349   | -7.28  | 62571  | -5.89  | 110347 | -8.63  | 141337 | -5.53  | 180661 | -7.17  |
| 10406  | -6.33  | 63837  | -7.31  | 110559 | -3.91  | 142333 | -7.60  | 190528 | -6.80  |
| 10671  | -9.92  | 66072  | -4.71  | 111593 | -5.81  | 143351 | -7.88  | 190748 | -6.50  |
| 12985  | -7.19  | 69584  | -9.17  | 112828 | -7.57  | 143748 | -8.31  | 201618 | -7.27  |
| 13481  | -8.36  | 70824  | -6.88  | 113311 | -6.99  | 144441 | -6.86  | 201666 | -7.58  |
| 13843  | -8.52  | 70914  | -10.38 | 113915 | -6.69  | 146005 | -5.81  | 202677 | -7.88  |
| 14013  | -9.08  | 70972  | -6.44  | 114133 | -6.67  | 147980 | -6.70  | 204583 | -6.64  |
| 15285  | -8.80  | 71012  | -5.49  | 114631 | -8.18  | 148001 | -6.77  | 204590 | -6.52  |
| 15903  | -6.04  | 71682  | -7.25  | 114673 | -6.33  | 149543 | -5.98  | 205546 | -7.69  |
| 16764  | -8.15  | 71790  | -6.86  | 114819 | -7.01  | 150206 | -5.53  | 205684 | -8.44  |
| 16765  | -8.15  | 72559  | -8.90  | 117195 | -6.40  | 150386 | -8.82  | 205811 | -9.58  |
| 16768  | -9.63  | 74975  | -5.98  | 117777 | -4.40  | 151215 | -7.83  | 210344 | -9.86  |
| 19223  | -6.33  | 77700  | -4.04  | 119707 | -7.51  | 152426 | -8.00  | 211226 | -8.04  |
| 21312  | -7.07  | 77720  | -6.21  | 119765 | -6.67  | 155243 | -8.07  | 211831 | -7.32  |
| 24914  | -6.17  | 79023  | -9.82  | 120183 | -8.89  | 156601 | -9.99  | 212018 | -8.10  |
| 26870  | -8.66  | 79566  | -5.62  | 122309 | -6.98  | 156773 | -7.17  | 212032 | -9.16  |
| 27265  | -7.41  | 81129  | -5.22  | 122514 | -6.38  | 157402 | -4.63  | 212112 | -5.07  |
| 30019  | -8.80  | 84538  | -7.53  | 123112 | -7.94  | 157967 | -6.14  | 213899 | -7.67  |
| 30967  | -8.94  | 85154  | -6.82  | 123222 | -6.57  | 161387 | -7.11  | 215556 | -9.97  |
| 31546  | -6.82  | 85267  | -7.91  | 123247 | -5.06  | 162183 | -6.11  | 216451 | -7.77  |
| 33408  | -6.04  | 85410  | -6.26  | 123976 | -8.04  | 162501 | -9.45  | 216506 | -6.50  |
| 34567  | -7.56  | 85518  | -7.29  | 124442 | -8.51  | 162765 | -6.29  | 216694 | -7.70  |
| 36487  | -6.69  | 85679  | -7.80  | 125281 | -7.81  | 163369 | -4.53  | 217080 | -7.22  |
| 36506  | -10.26 | 85740  | -5.44  | 125661 | -5.16  | 164089 | -10.94 | 226116 | -7.55  |
| 37117  | -7.73  | 86711  | -8.34  | 126424 | -5.30  | 164113 | -5.63  | 226178 | -8.16  |
| 37815  | -8.77  | 88972  | -5.92  | 127678 | -8.73  | 164377 | -7.48  | 226517 | -9.62  |
| 39006  | -6.08  | 89808  | -8.49  | 127690 | -6.39  | 164929 | -6.86  | 227395 | -4.90  |
| 39612  | -8.07  | 91332  | -10.58 | 128094 | -4.94  | 165995 | -5.63  | 230297 | -11.56 |
| 42399  | -3.86  | 91397  | -8.77  | 128583 | -6.90  | 167739 | -6.07  | 231315 | -9.15  |
| 44491  | -8.35  | 92204  | -7.31  | 128594 | -9.96  | 167819 | -7.97  | 231923 | -6.49  |
| 45093  | -5.71  | 92228  | -6.56  | 130101 | -8.92  | 170757 | -7.31  | 232022 | -7.76  |
| 234698 | -9.18  | 341661 | -10.03 | 515421 | -6.74  | 630981 | -4.02  | 667386 | -6.67  |
| 240360 | -7.78  | 343544 | -8.27  | 523235 | -6.63  | 632016 | -7.68  | 667708 | -8.21  |
| 244974 | -8.87  | 344240 | -9.77  | 527570 | -5.76  | 632242 | -7.23  | 671438 | -7.18  |
| 254681 | -9.24  | 345725 | -6.28  | 529321 | -8.55  | 633057 | -8.81  | 672084 | -9.87  |
| 269193 | -5.06  | 346878 | -7.48  | 602681 | -7.58  | 633971 | -6.54  | 672293 | -6.93  |
| 270150 | -7.33  | 349963 | -8.74  | 603656 | -6.02  | 637660 | -5.35  | 674002 | -6.56  |
| 270734 | -7.73  | 350111 | -7.52  | 608550 | -6.07  | 638038 | -8.44  | 674012 | -7.49  |
| 273905 | -9.93  | 350986 | -6.01  | 609357 | -6.18  | 639829 | -7.75  | 674612 | -6.47  |

|               |        |               |        |               |        |               |        |               |        |
|---------------|--------|---------------|--------|---------------|--------|---------------|--------|---------------|--------|
| <b>277480</b> | -6.71  | <b>353485</b> | -7.82  | <b>609523</b> | -7.09  | <b>640341</b> | -8.46  | <b>675766</b> | -7.19  |
| <b>279829</b> | -8.74  | <b>356465</b> | -8.40  | <b>610540</b> | -6.14  | <b>640991</b> | -7.84  | <b>675767</b> | -7.98  |
| <b>281299</b> | -6.16  | <b>356785</b> | -6.84  | <b>612475</b> | -11.78 | <b>640996</b> | -8.47  | <b>676464</b> | -6.49  |
| <b>284669</b> | -6.31  | <b>357681</b> | -7.99  | <b>612977</b> | -6.44  | <b>641217</b> | -7.11  | <b>676607</b> | -10.51 |
| <b>289626</b> | -8.76  | <b>359827</b> | -7.77  | <b>613586</b> | -9.79  | <b>641250</b> | -9.53  | <b>677157</b> | -8.56  |
| <b>291629</b> | -7.83  | <b>363784</b> | -8.54  | <b>613748</b> | -9.15  | <b>641602</b> | -8.05  | <b>679497</b> | -8.87  |
| <b>292943</b> | -8.22  | <b>363918</b> | -7.99  | <b>617013</b> | -7.05  | <b>642075</b> | -9.13  | <b>679513</b> | -7.98  |
| <b>294866</b> | -6.30  | <b>364069</b> | -5.18  | <b>618178</b> | -9.15  | <b>642305</b> | -9.36  | <b>680329</b> | -6.28  |
| <b>296242</b> | -7.28  | <b>364385</b> | -6.65  | <b>618443</b> | -8.03  | <b>642324</b> | -9.54  | <b>681170</b> | -7.55  |
| <b>298141</b> | -6.91  | <b>365357</b> | -9.29  | <b>618449</b> | -7.27  | <b>643509</b> | -8.32  | <b>681536</b> | -6.23  |
| <b>299208</b> | -6.69  | <b>366098</b> | -10.03 | <b>618555</b> | -7.66  | <b>644965</b> | -8.06  | <b>681633</b> | -9.27  |
| <b>299236</b> | -6.60  | <b>367933</b> | -9.70  | <b>618660</b> | -6.12  | <b>645168</b> | -7.72  | <b>681958</b> | -8.38  |
| <b>300910</b> | -5.19  | <b>368279</b> | -9.58  | <b>618682</b> | -7.14  | <b>645980</b> | -7.98  | <b>682500</b> | -5.65  |
| <b>304891</b> | -8.56  | <b>371012</b> | -7.01  | <b>618688</b> | -7.39  | <b>646474</b> | -8.47  | <b>682506</b> | -9.00  |
| <b>308001</b> | -12.89 | <b>371194</b> | -9.22  | <b>619196</b> | -8.95  | <b>647592</b> | -7.47  | <b>683237</b> | -6.63  |
| <b>309842</b> | -6.26  | <b>371488</b> | -6.25  | <b>620478</b> | -5.46  | <b>648635</b> | -7.81  | <b>683711</b> | -5.60  |
| <b>310324</b> | -7.03  | <b>372059</b> | -6.86  | <b>622586</b> | -6.06  | <b>648639</b> | -6.49  | <b>685509</b> | -8.20  |
| <b>310361</b> | -6.11  | <b>372302</b> | -8.31  | <b>622958</b> | -7.87  | <b>648650</b> | -8.51  | <b>685706</b> | -7.53  |
| <b>310835</b> | -6.76  | <b>372523</b> | -6.23  | <b>623091</b> | -7.44  | <b>648689</b> | -4.84  | <b>687105</b> | -5.60  |
| <b>313957</b> | -7.85  | <b>372642</b> | -7.95  | <b>623712</b> | -6.35  | <b>651331</b> | -2.48  | <b>687524</b> | -7.88  |
| <b>317877</b> | -6.57  | <b>374682</b> | -6.69  | <b>623768</b> | -8.57  | <b>652035</b> | -6.80  | <b>687739</b> | -7.86  |
| <b>318822</b> | -6.85  | <b>375722</b> | -8.47  | <b>624333</b> | -6.88  | <b>652861</b> | -8.23  | <b>687869</b> | -8.80  |
| <b>319112</b> | -6.44  | <b>379100</b> | -11.92 | <b>624425</b> | -8.16  | <b>652900</b> | -7.40  | <b>688818</b> | -9.21  |
| <b>319688</b> | -6.66  | <b>379472</b> | -6.59  | <b>624454</b> | -8.06  | <b>654387</b> | -5.83  | <b>690564</b> | -8.85  |
| <b>320204</b> | -6.91  | <b>380509</b> | -6.54  | <b>624546</b> | -7.25  | <b>655041</b> | -5.69  | <b>691348</b> | -7.57  |
| <b>320212</b> | -7.15  | <b>381584</b> | -7.28  | <b>624547</b> | -7.74  | <b>656455</b> | -7.52  | <b>691350</b> | -7.51  |
| <b>320562</b> | -7.93  | <b>400063</b> | -6.50  | <b>624548</b> | -6.76  | <b>657990</b> | -7.19  | <b>691424</b> | -8.98  |
| <b>320864</b> | -7.16  | <b>401688</b> | -7.98  | <b>627785</b> | -5.81  | <b>658262</b> | -11.55 | <b>691578</b> | -6.86  |
| <b>325304</b> | -10.66 | <b>401696</b> | -9.32  | <b>627889</b> | -7.93  | <b>658994</b> | -9.12  | <b>693055</b> | -5.53  |
| <b>328102</b> | -7.03  | <b>401828</b> | -6.81  | <b>629819</b> | -11.91 | <b>659343</b> | -8.01  | <b>693123</b> | -6.76  |
| <b>331921</b> | -7.88  | <b>403031</b> | -4.68  | <b>629827</b> | -6.15  | <b>661081</b> | -7.54  | <b>694919</b> | -6.36  |
| <b>333346</b> | -5.14  | <b>405904</b> | -8.03  | <b>630312</b> | -6.25  | <b>662564</b> | -5.93  | <b>695857</b> | -6.62  |
| <b>335415</b> | -7.73  | <b>406369</b> | -6.67  | <b>630321</b> | -7.18  | <b>664889</b> | -6.47  | <b>731365</b> | -7.04  |
| <b>335994</b> | -10.45 | <b>408562</b> | -9.79  | <b>630373</b> | -9.79  | <b>665312</b> | -7.94  | <b>338620</b> | -7.10  |
| <b>337738</b> | -8.06  | <b>409253</b> | -6.93  | <b>512601</b> | -5.48  | <b>666613</b> | -7.16  |               |        |
| <b>338540</b> | -8.51  | <b>409615</b> | -7.79  | <b>514213</b> | -6.78  | <b>666714</b> | -7.03  |               |        |

**Table S4.** Interacting residues of PPAR $\gamma$  antagonists at the orthosteric site.

| <b>Compound</b> | <b>Interacting Residues</b>    | <b>Compound</b> | <b>Interacting Residues</b>    |
|-----------------|--------------------------------|-----------------|--------------------------------|
| <b>NSI</b>      | Phe282, Phe363, Lys367, His449 | <b>22</b>       | Phe282, Phe363, Lys367         |
| <b>SR1664</b>   | Lys265, Ser289, Ser342, Lys367 | <b>23</b>       | Phe363                         |
| <b>SR11023</b>  | Lys265, Ser289, Ser342         | <b>24</b>       | Phe282, Lys367, His449         |
| <b>1</b>        | Phe282, Phe363, Lys367, His449 | <b>25</b>       | Phe363                         |
| <b>2</b>        | Phe282, His449                 | <b>26</b>       | Phe282, Lys367                 |
| <b>3</b>        | Phe282, Phe363, His449         | <b>27</b>       | Lys265, Ser289, Ser342         |
| <b>4</b>        | Lys367, His449                 | <b>28</b>       | Lys265, Ser342                 |
| <b>5</b>        | Lys367                         | <b>29</b>       | Lys265, Ser289, Ser342         |
| <b>6</b>        | His449                         | <b>30</b>       | Lys265, Ser289, Ser342         |
| <b>7</b>        | Phe282, Lys367, His449         | <b>31</b>       | Lys265, Phe282, Ser342         |
| <b>8</b>        | Phe282, Lys367, His449         | <b>32</b>       | Lys265, Phe282, Ser342         |
| <b>9</b>        | Phe282, His449                 | <b>33</b>       | Lys265                         |
| <b>10</b>       | Phe363, Lys367, His449         | <b>34</b>       | Lys265, Phe282, Ser289, Ser342 |
| <b>11</b>       | Phe282, Lys367                 | <b>35</b>       | Lys265, Ser342, Tyr473         |
| <b>12</b>       | Lys367                         | <b>36</b>       | Lys265, Ser342                 |
| <b>13</b>       | Lys367, His449                 | <b>37</b>       | Lys265, Phe282                 |
| <b>14</b>       | Phe282, Lys367, His449         | <b>38</b>       | Lys265                         |
| <b>15</b>       | Phe282, Lys367, His449         | <b>39</b>       | Lys265, Ser342                 |
| <b>16</b>       | Phe282, Phe363, Lys367         | <b>40</b>       | Lys265, Glu291                 |
| <b>17</b>       | Phe282, Lys367                 | <b>41</b>       | Lys265, Gly284, Tyr327         |
| <b>18</b>       | Phe282, Lys367                 | <b>42</b>       | Lys265                         |
| <b>19</b>       | Phe282, Lys367                 | <b>43</b>       | Lys265                         |
| <b>20</b>       | NA                             | <b>44</b>       | NA                             |
| <b>21</b>       | Phe282, Phe363, Lys367         |                 |                                |

**Table S5.** Interacting residues of PPAR $\gamma$  agonists at the orthosteric site and the allosteric site based on the Induced-Fit Docking.

| Title                | Ortho                          | Allo                           |
|----------------------|--------------------------------|--------------------------------|
| <b>Rosiglitazone</b> | Ser289, His323, Gln286, Lys367 | His323, Tyr327, Tyr473         |
| <b>Lobeglitazone</b> | Ser289, His323, Gln286, Lys367 | Lys265, Tyr473, Tyr327         |
| <b>Pioglitazone</b>  | Ser289, His323, Gln286, Lys367 | His323, Tyr327, Tyr473, Leu340 |
| <b>GW1929</b>        | Leu340, Glu343, Lys265         | HIE266, LYS265, Ser342         |
| <b>Farglitazar</b>   | Ser342                         | HIE266, LYS265, Ser342         |
| <b>Edaglitazone</b>  | Ser342                         | His323, Tyr327, Tyr473         |
| <b>Amorfrutin 1</b>  | Ser342, Glu343, Arg288         | Glu343, Lys265                 |
| <b>Amorfrutin 2</b>  | Ser342, Glu343, Arg288         | Ser342                         |
| <b>MRL20</b>         | Ser342                         | Ser342                         |

## References

1. Hopkins, C.R.; O'Neil, S.V.; Laifersweiler, M.C.; Wang, Y.; Pokross, M.; Mekel, M.; Evdokimov, A.; Walter, R.; Kontoyianni, M.; Petrey, M.E.; et al. Design and synthesis of novel N-sulfonyl-2-indole carboxamides as potent PPAR- $\gamma$  binding agents with potential application to the treatment of osteoporosis. *Bioorganic Med. Chem. Lett.* **2006**, *16*, 5659–5663. <https://doi.org/10.1016/j.bmcl.2006.08.003>.
2. Asteian, A.; Blayo, A.-L.; He, Y.; Koenig, M.; Shin, Y.; Kuruvilla, D.S.; Corzo, C.A.; Cameron, M.D.; Lin, L.; Ruiz, C.; et al. Design, Synthesis, and Biological Evaluation of Indole Biphenylcarboxylic Acids as PPAR $\gamma$  Antagonists. *ACS Med. Chem. Lett.* **2015**, *6*, 998–1003. <https://doi.org/10.1021/acsmedchemlett.5b00218>.
